# Supplementary material for: Switching to Once-Daily Liraglutide From Twice-Daily Exenatide Further Improves Glycemic Control in Patients With Type 2 Diabetes Using Oral Agents
Source: PubMed Central journal article supplement — Diabetes Care. 2010 Mar 23;33(6):1300–3. doi: 10.2337/dc09-2260 (PMC2875443; doi:10.2337/dc09-2260), 2010-03-23
Supplement: supp_dc09-2260_onlineappendix.pdf [file supp_dc09-2260_onlineappendix.pdf]

## ONLINE APPENDIX

### LEAD-6 Study Principal Investigators

A Ahmed, M Alvarsson, C Anderson, T Aoki, S Aranko, T Bailey, D Barbonta, C Baur, M Bednarczyk-Kaluzny, T Blevins, L Blonde, B Bode, P Bressler, O Brusco, J B Buse, L Byrd, M Byrne, F Caldarella, W Cheatham, E Christ, J S Christiansen, L M Comas, J Cooper, C Corder, B Corser, J-P Courreges, G Creteanu, R Cuddihy, T Derezinski, H J Downey, S Duckor, M Eidenmüller, S Elliott, J Farrell, F Fusco, E Gaczrek-Belczyk, B Gallwitz, A Garber, P Gerber, J Gibney, K Glodowska, G M Gollapudi, D Gouet, S Greco, V Grill, S Gudnason, B Guerci, J Gumprecht, J E Henriksen, K Hermansen, S Hippler, J Hoekstra, B Hoffman, P Hollander, E Jaeckel, R Jain, A Janez, M Kaiser, J Kaladas, A Kapoor, D Kayne, U Keller, H-P Kempe, E Klein, D Klonoff, L Koehler, M Korytkowski, D H Laine, C Le Devehat, H H Lervang, L Levinson, A Lewin, U Lilavivat, R Lipetz, B Lubin, J Luedemann, S Madsbad, J Mäkelä, C Marck, N Matejek, E Menéndez, E Montanya, T Milenkovic, R Mira, E Moberg, D Musat, J Nolan, R Ollins, R Ortiz-Carrasquillo, K Osei, G Peterson, J Philippe, A Pietri, M Piletic, M Polaszewska-Muszynska, J Pollock, R Prager, A Radparvar, L Ratcliff, J C Reed, M Reeves, K Rock, J Rosenstock, K Sall, J Schabowski, G Schernthaner, W E Schmidt, S Schwartz, T Segiet, G Serfer, J Sieradzki, S Singh, D Smith, E Søfteland, F V Solano, T Stasinska, M Staut, P Stearns, M Stoll, J Strand, R Tamayo, H Toplak, R Townsend, A Vaag, C Vance, G von Bergmann, T Wascher, R Weinstein, D Weiss, U Wendisch, V Wenzl-Bauer, F Whittier, E Wizemann, G Yeoman, H Yki-Järvinen.
